# Supplementary material for: Topology, magnetism and dye adsorption properties of metal organic frameworks (MOFs) synthesized from bench chemicals
Source: Royal Society of Chemistry journal article supplement (doi:10.1039/c9ce01041f), 2019-01-01
Supplement: c9ce01041f1.pdf [file c9ce01041f1.pdf]

## Topology, magnetism and dye adsorption properties of metal organic frameworks (MOFs) synthesized from bench chemicals

Khushboo Iman<sup>a</sup>, M. Shahid,<sup>\*a</sup> M. Shahnawaz Khan<sup>a</sup>, Musheer Ahmad<sup>b</sup>, Farasha Sama<sup>c</sup>

<sup>a</sup>Department of Chemistry, Aligarh Muslim University, Aligarh 202002, India

<sup>b</sup>Department of Applied Chemistry (ZHCET), Aligarh Muslim University, Aligarh 202002, India

<sup>c</sup>Department of Chemistry, Indian Institute of Technology Kanpur, Kanpur 208016, India

\*Corresponding author, E-mail: [shahid81chem@gmail.com](mailto:shahid81chem@gmail.com)

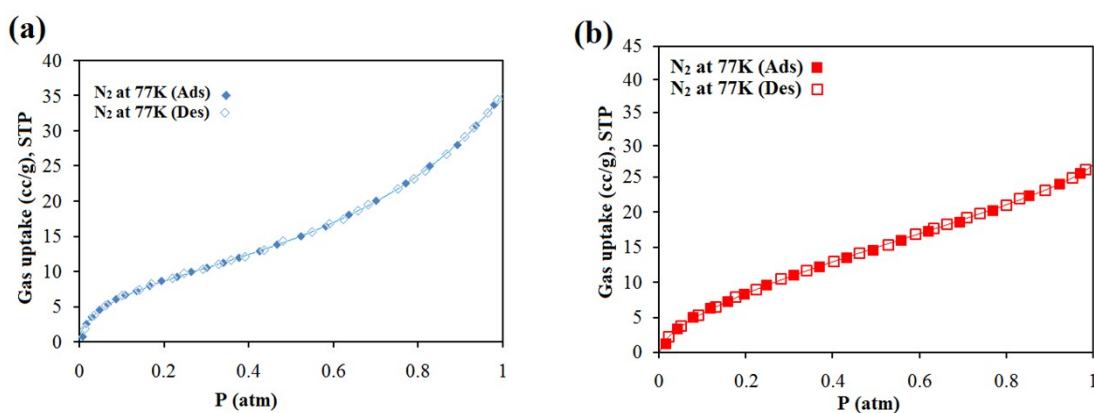

Fig. 1S. N<sub>2</sub> adsorption/desorption isotherms for CuMOF-1 (a) and CoMOF-2 (b) showing no noticeable porosity.

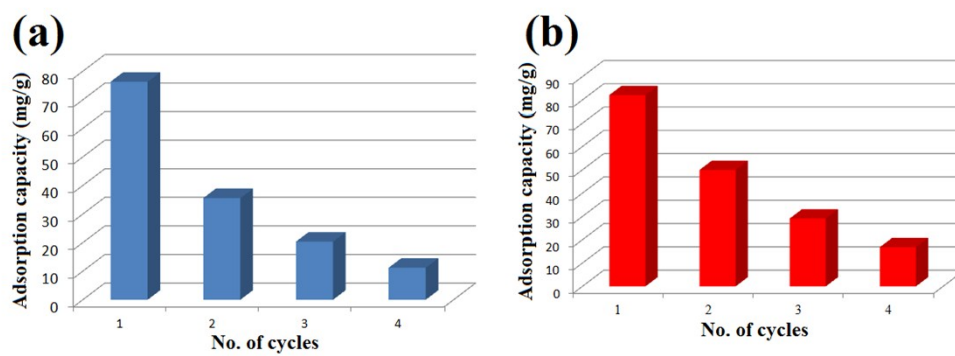

Fig 2S. Desorption plot of MB from CuMOF-1 (a) and CoMOF-2 (b) for four cycles.

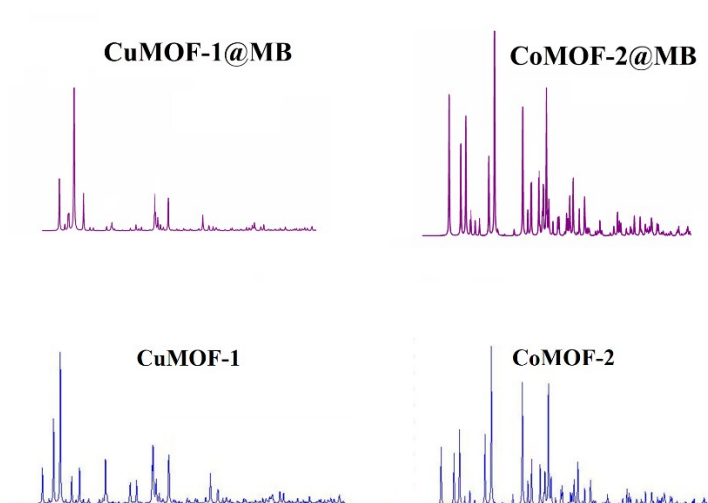

Fig 3S. PXRD patterns of CuMOF-1 and CoMOF-2 before and after the adsorption of MB.

Table 1S: Selected bond lengths for CuMOF-1 and CoMOF-2.

| <b>CuMOF-1</b> |            | <b>CoMOF-2</b> |            |
|----------------|------------|----------------|------------|
| Cu1 - O2       | 2.1327(18) | Co1- O1        | 2.0355(11) |
| Cu1 -O3        | 2.1711(17) | Co1- O1        | 2.0355(11) |
| Cu1 -O5        | 2.0007(18) | Co1- O2        | 2.1763(11) |
| Cu1 -O6        | 2.1375(17) | Co1- O2        | 2.1763(11) |
| Cu1 -N1        | 2.159(2)   | Co1- N1        | 2.1180(13) |
| Cu1 -N2        | 2.1579(19) | Co1- N1        | 2.1180(13) |
| Cu2 -O1        | 2.0370(17) | Cl1- O2        | 1.4609(11) |
| Cu2 -O4        | 2.0752(17) | Cl1- O3        | 1.4408(13) |
| Cu2 -O5        | 1.9250(18) | Cl1- O4        | 1.4314(13) |
| Cu2 -N3        | 2.1829(19) | Cl1- O5        | 1.4317(12) |
| Cu2 -N4        | 2.1999(19) | O1- H1a        | 0.837(14)  |
| O1- C21        | 1.261(3)   | O1- H1b        | 0.815(14)  |
| O2 -C2         | 1.247(3)   | N1- C1         | 1.341(2)   |
| O3 -C23        | 1.253(3)   | N1- C5         | 1.347(2)   |
| O4 -C23        | 1.280(3)   | C1- H1         | 0.9500     |
| O5 -H5         | 0.82(4)    | C1- C2         | 1.382(2)   |
| O6 -H6a        | 0.866(16)  | C2- H2         | 0.9500     |
| O6 -H6b        | 0.868(16)  | C2- C3         | 1.394(2)   |
| N1 -C1         | 1.337(3)   | C3- C3         | 1.487(3)   |

Table 2S: Selected bond angles for CuMOF-1 and CoMOF-2.

| <b>CuMOF-1</b> |            | <b>CoMOF-2</b> |          |
|----------------|------------|----------------|----------|
| O3- Cu1-O2     | 89.66(14)  | O1 -Co1 -O1    | 180.02   |
| O5- Cu1- O2    | 97.15(8)   | O2 -Co1- O1    | 82.64(4) |
| O5- Cu1-O3     | 173.15(15) | O2- Co1- O1    | 97.36(4) |
| O6 -Cu1- O2    | 174.60(7)  | O2 -Co1- O1    | 82.64(4) |
| O6 -Cu1- O3    | 85.03(7)   | O2- Co1 -O1    | 97.36(4) |
| O6- Cu1- O5    | 88.15(7)   | O2- Co1 -O2    | 180.0    |
| N1 -Cu1- O2    | 88.15(7)   | N1- Co1- O1    | 90.39(5) |
| N1- Cu1- O3    | 88.44(7)   | N1 -Co1 -O1    | 89.61(5) |
| N1- Cu1- O5    | 92.24(7)   | N1 -Co1- O1    | 89.61(5) |
| N1- Cu1- O6    | 90.49(7)   | N1- Co1 -O1    | 90.39(5) |
| N2- Cu1- O2    | 91.44(7)   | N1 -Co1 -O2    | 90.01(5) |
| N2- Cu1- O3    | 86.79(7)   | N1 -Co1- O2    | 89.99(5) |
| N2- Cu1- O5    | 92.52(7)   | N1 -Co1- O2    | 90.01(5) |
| N2- Cu1- O6    | 89.25(7)   | N1 -Co1 -O2    | 89.99(5) |
| N2- Cu1- N1    | 175.23(8)  | N1- Co1 -N1    | 180.02   |
| O4- Cu2- O1    | 149.19(7)  |                |          |
| O5- Cu2- O1    | 107.42(7)  |                |          |
| O5- Cu2- O4    | 103.38(7)  |                |          |
| N3- Cu2- O1    | 87.93(7)   |                |          |
| N3 -Cu2 -O4    | 87.78(7)   |                |          |
| N3- Cu2- O5    | 99.78(7)   |                |          |
| N4- Cu2- O1    | 87.10(7)   |                |          |
| N4- Cu2- O4    | 88.22(7)   |                |          |
| N4- Cu2- O5    | 97.17(7)   |                |          |
| N4- Cu2- N3    | 163.05(8)  |                |          |

Table 3S: Summary of maximum adsorption capacity ( $q_{\max}$ ) of various MOFs towards MB and/or MO.

| MOF                                                          | Adsorption capacity<br>$q_{\max}$ (mg g <sup>-1</sup> ) |        | References |
|--------------------------------------------------------------|---------------------------------------------------------|--------|------------|
|                                                              | MB                                                      | MO     |            |
| MOF-235                                                      | 187                                                     | 477    | a          |
| Fe-MIL-101                                                   | 124.07                                                  | 505.05 | b          |
| Cu-BDC                                                       | -                                                       | 86.71  | c          |
| [Cd <sub>2</sub> (L)(DMF) <sub>3</sub> ].0.5DMF <sub>n</sub> | 68.5                                                    | -      | d          |
| Ce(III)-doped UiO-66                                         | 145.1                                                   | -      | e          |
| Fe <sub>3</sub> O <sub>4</sub> @ZIF-8                        | 20.2                                                    | -      | f          |
| HKUST-1                                                      | 15.3                                                    | -      | g          |
| UiO-66-P composite                                           | 91.1                                                    | -      | h          |
| CuMOF-1                                                      | 110                                                     | 46.80  | This work  |
| CoMOF-2                                                      | 158                                                     | 25.50  | This work  |

- a. E. Haque, J. W. Jun, S. H. Jhung, *J. Hazard. Mat.* 2011, **185**, 507.
- b. S. M. Hassan, A. A. Ibrahim, D. A. Mohamed, *Int. J. Mod. Chem.*, 2017, **9**, 111.
- c. R. S. Salama, S. A. El-Hakam, S. E. Samra, S. M. El-Dafrawy and A. I. Ahmed, *Int. J. Mod. Chem.*, 2018, **10**, 195.
- d. W.-P. Wu, J. Wu, J.-Q. Liu, M. Trivedi and A. Kumar, *RSC Adv.*, 2017, **7**, 54522.
- e. J.-M. Yang, R.-J. Ying, C.-X. Han, Q.-T. Hu, H.-M. Xu, J.-H. Li, Q. Wang and W. Zhang, *Dalton Trans.*, 2018, **47**, 3913.
- f. J. Zheng, C. Cheng, W. J. Fang, C. Chen, R. W. Yan, H. X. Huai and C. C. Wang, *CrystEngComm*, 2014, **16**, 3960.
- g. J. H. Qiu, Y. Feng, X. F. Zhang, M. M. Jia and J. F. Yao, *J. Colloid Interface Sci.*, 2017, **499**, 151.
- h. J. M. Yang, *J. Colloid Interface Sci.*, 2017, **505**, 178–185.
